# Supplementary material for: Dengue virus infection modifies mosquito blood-feeding behavior to increase transmission to the host
Source: PubMed Central journal article supplement — Proc Natl Acad Sci U S A. 2022 Jan 10;119(3):e2117589119. doi: 10.1073/pnas.2117589119 (PMC8785958; doi:10.1073/pnas.2117589119), 2022-01-10
Supplement: pnas.2117589119.sapp.pdf [file pnas.2117589119.sapp.pdf]

## Supplementary Information

### Dengue virus infection modifies mosquito blood-feeding behavior to increase transmission to the host

Benjamin Wong Wei Xiang<sup>1,3</sup>, Wilfried A. A. Saron<sup>1</sup>, James Charles Stewart<sup>2</sup>, Arthur Hain<sup>1</sup>, Varsha Walvekar<sup>3</sup>, Dorothée Missé<sup>4</sup>, Frédéric Thomas<sup>5</sup>, R. Manjunatha Kini<sup>3,6</sup>, Benjamin Roche<sup>4</sup>, Adam Claridge-Chang<sup>2</sup>, Ashley L. St John<sup>1,7,8,9</sup>, Julien Pompon<sup>1,4,11,\*</sup>.

### Table of Contents

|                                                       |    |
|-------------------------------------------------------|----|
| 1. Supplementary Methods .....                        | 3  |
| Mosquitoes .....                                      | 3  |
| Mouse .....                                           | 3  |
| Virus .....                                           | 3  |
| Mosquito oral infection .....                         | 4  |
| Absolute quantification of DENV load .....            | 4  |
| Design of the behavioral assay device .....           | 5  |
| Behavior video recording.....                         | 5  |
| Behavior annotation .....                             | 6  |
| Multivariate statistical analysis.....                | 6  |
| Biological interpretation of the factors.....         | 7  |
| Univariate statistical analysis.....                  | 10 |
| Large cage host-seeking behavioral assay .....        | 10 |
| Calculation of biting and blood ingestion rates ..... | 11 |
| Successive bite assay .....                           | 11 |
| Mathematical modelling of DENV epidemiology.....      | 12 |
| Supplementary References.....                         | 13 |
| 2. Supplementary Movies .....                         | 15 |

|                                 |    |
|---------------------------------|----|
| S1 Movie .....                  | 15 |
| S2 Movie .....                  | 15 |
| 3. Supplementary Figures .....  | 15 |
| S1 Fig .....                    | 15 |
| 4. Supplementary Datasets ..... | 15 |
| Dataset S1 .....                | 15 |
| Dataset S2 .....                | 15 |
| Dataset S3 .....                | 16 |
| Dataset S4 .....                | 16 |
| 5. Supplementary Tables .....   | 17 |
| S1 Table .....                  | 17 |
| S2 Table .....                  | 20 |
| S3 Table .....                  | 23 |
| S4 Table .....                  | 24 |
| S5 Table .....                  | 25 |
| S6 Table .....                  | 26 |
| S7 Table .....                  | 26 |
| S8 Table .....                  | 27 |
| S9 Table .....                  | 28 |

## 1. Supplementary Methods

### **Mosquitoes**

The *Aedes aegypti* colony was established from eggs collected in Singapore in 2010 and reared in the insectary ever since. Colony eggs were hatched in MilliQ water. Larvae, at a density of 2.5-3 larvae per cm<sup>2</sup> of shallow water, were fed a mixture of 1:1 bovine liver powder: brewer's yeast (MP Biomedicals) and fish food flakes (TetraMin Crisps Pro) until pupation. Adults were reared in cages (Bioquip) supplemented with 10% sucrose solution and water. The insectary was maintained at 28°C with 50% relative humidity on a 12:12h dark: light cycle. Mosquitoes were reared together until females were isolated and separated into two groups, to be used under infection and control conditions.

### **Mouse**

AG129 mice purchased from B&K Universal (UK) and C57BL/6Ntac mice purchased from InVivos (Singapore) were housed in the biosafety level 2 (BSL-2) animal facility at Duke-NUS, Singapore. All animal experiments were carried out as outlined in approved protocols (IACUC permission number: 2016/SHS/1194 and 2016/SHS/1196). Mice were housed with the following conditions: light cycle of 17h light/7h dark, humidity of about 57%, temperature of 23.5°C. No more than 5 mice per cage were fed irradiated rat and mouse Diet (Specialty Feed) *ad libitum*. Eight to 12 week-old male mice were used for behavior and transmission assays. Fur on the mouse belly was shaved one day prior behavioral assay to prevent any influence of shaving-induced inflammation.

### **Virus**

The dengue virus serotype 2 EDEN2 strain was collected in 2005 from a patient at the Singapore General Hospital (sequence ID: EU081177.1) (1) and passaged no more than 7 times before use. EDEN2 was propagated in C6/36 *Aedes albopictus* cells (ATCC CRL-1660) maintained in RPMI (Roswell Park Memorial

Institute Medium) (Gibco) with 2% FBS (Research Instruments Pte), titrated using BHK-21 cells (ATCC) as detailed (2), aliquoted, and stored at -80°C until use.

### **Mosquito oral infection**

Three to five-day-old female mosquitoes were starved for 18h and offered an artificial blood meal containing 40% volume of washed erythrocytes from specific-pathogen-free (SPF) pig's blood (PWG Genetics), 5% 10 mM ATP (ThermoScientific), 5% human serum (Sigma) and 50% virus solution in RPMI (Gibco). Titer for infectious blood was  $5 \times 10^7$  pfu / ml and was validated by plaque assay on BHK-21 cells. Control mosquitoes were offered non-infectious blood with 50% RPMI instead of virus solution. Mosquitoes were left to feed for 1.5 h using Hemotek membrane feeding system (Discovery Workshops) covered with porcine membrane (sausage casing). Fully engorged females following infectious or non-infectious blood feeding were selected and maintained with constant access to 10% sugar solution at 28°C with 50% relative humidity on a 12:12 h dark: light cycle for ten days before analysis.

### **Absolute quantification of DENV load**

RNA was extracted from 20 randomly-selected mosquitoes 10 days after oral infection or non-infectious blood feeding. Total RNA was extracted using E.Z.N.A total RNA kit I (OMEGA Bio-Tek) and used for one step RT-qPCR with *iTaq Universal Probes One-Step* (Bio-Rad) targeting gRNA with primers 5' CAG GTT ATG GCA CTG TCA CGA T 3' and 5' CCA TCT GCA GCA ACA CCA TCT C 3' and Hex/bhq-1 probe 5' CTC TCC GAG AAC AGG CCT CGA CTT CAA 3'. gRNA was quantified on a CFX96 Touch Real-Time PCR Detection System (Bio-Rad) with a thermal profile of 50°C for 10 min, 95°C for 1 min and 40 cycles of 95°C for 10 sec and 60°C for 15 sec. RNA fragments encompassing the qPCR target were produced and used to generate an absolute standard curve as described (2).

### **Design of the behavioral assay device**

The device was custom designed with clear acrylic and consisted of an upper and a lower platform (Fig. 1B and C). The upper platform was designed to secure an anesthetized mouse and was perforated to allow mosquito access to the mouse belly through four observation chambers. The upper platform could be lowered onto the lower platform to position the observation chambers in contact with the mouse belly. The lower platform housed four observation chambers and acted as alignment guide to position the chambers below the mouse belly. The observation chambers were 7.5 × 10 × 30 mm (W × L × H) and housed a single mosquito that was locked by a cotton plug. Clear acrylic was used except for the back, which was made of white acrylic to provide a contrasting background. A fine mesh was sealed on top of the chamber, allowing the mosquito to pass its proboscis through. Internal walls except the front were etched with steps and the surface was roughened to facilitate mosquito movement.

A Blackfly 0.3 MP camera (FLIR Integrated Imaging Solutions) was mounted onto a base plate board (Thor Labs). An LED light was installed underneath the camera on the platform. The entire platform setup was placed in an incubation chamber to maintain the temperature at 28°C.

### **Behavior video recording**

At 10 days post infection, a single cold-anesthetized mosquitoes was loaded and starved in each observation chamber at 28°C for 18–24 h prior to behavior recording. Each mosquito was used for only one recording. Four chambers were mounted side-by-side on the lower platform and contained two control and two infected mosquitoes in alternate positions (Fig. 1 D and E; Fig. S1B). One AG129 mouse was anesthetized by intraperitoneal injection of 10 µl per mg of mouse of a solution containing 5 mg/ml of ketamine and 1 mg/ml of xylazine. Mice were then placed onto the upper platform. To normalize the starting position for the mosquitoes, chambers were gently tapped to drop them at the bottom before lowering the upper platform. Video recording was started when the upper platform was lowered onto the

chambers and lasted for 30 min. Mice were changed every four recordings to limit the influence of previous bites. Behavior recording was conducted at 28°C across several days from 4–9 pm to synchronize with the mosquito circadian rhythm.

### **Behavior annotation**

Videos recorded at 60 frames per second were saved in mp4 file format, converted to individual frames as photos in JPEG file format with VLC (videolan.org) and annotated manually. An in-house software translated the frame number into duration and allowed exportation of the annotated behavior in excel format (Annotation software; <https://drive.google.com/file/d/1r-GPTsmUuWE4y1WeAeYD7S8Lr1nbcvvy/view>). The annotation software allowed distance calculation and was used to measure proboscis length and girth. Registered activities included (i) locomotor activities: walking and immobile, (ii) positions: mid-range, short-range, in contact with the mouse, (iii) proboscis activities: insertion into the skin, inserted length, downward and upward motions within the skin, grooming (defined as leg-aided rubbing like *Drosophila* (3)), and wriggling (defined as short proboscis movements outside the skin), (iv) blood-feeding-related activities: blood ingestion, abdomen swelling, (v) body maintenance activities: wing grooming (defined as leg-aided rubbing). The conditions of the mosquitoes (infected vs. control) were blinded during the annotation. The annotation outputs were computed into 80 behavioral parameters (S1 Table) using a Visual Basic for Applications (VBA) macro (S1 Text). To allow for multivariate statistical analysis, which removes a repeat with missing values, we ascribed conservative values to parameters when the related behavior did not occur (S2 Table).

### **Multivariate statistical analysis**

Factor analysis based on correlation matrix was applied to the 44 host-seeking behavioral parameters for all DENV and control mosquitoes and separately to the 36 biting behavioral parameters for DENV and

control mosquitoes that probed. To improve interpretability, factor analysis was conducted with varimax rotation, which minimizes the number of parameters with high loadings within each factor, thereby generating factors with fewer highly influential parameters. The factor analysis grouped correlated parameters into factors and assigned a loading score to each parameter, indicating the parameter influence on the factor value.

Factor loadings were extracted to biologically interpret factors based on the parameter ordination for the highest loadings (> 0.6). Each factor explained a percentage of total variance that represented its contribution to the overall mosquito behavior. Only factors that explained more than 5% of the total variance were analyzed. Differences in scores for the orthogonal factors were tested using a one-sided unpaired T-test, assuming that the impact of DENV either increased or decreased the factor scores. To minimize the known large variance in animal behavior (4, 5), which lowers statistical power, we set the significance threshold at 0.055. Statistical analyses were performed with SYSTAT 13.0 (Systat Software).

### **Biological interpretation of the factors**

*Host-seeking behavior – data in S4-S5 Table and Fig. 2B*

Factor 1: Five of the parameters measured durations and numbers of walking events both at short-range and in contact. The factor also positively correlated with two parameters that described the number of immobile events, as this correlates with walking initiation and arrest. The factor was associated with high locomotor activity and thus interpreted as ‘restlessness’.

Factor 2: Loading signs indicated an inverse correlation between ‘duration at mid-range distance’ (positive sign) and ‘duration in contact’ (negative sign). Duration at mid-range distance shows lack of host attraction, whereas duration in contact represents attraction. Together with a positive loading for ‘duration at mid-range distance after in contact without probing’, we inferred that factor 2 represented a lack of attraction to the host even after sensing the surface chemistry of the mouse skin. ‘Averaged and

total duration of immobilization' also negatively correlated with factor 2, suggesting that lack of host attraction is associated with shorter immobilization periods. Moreover, the positive correlation of 'time to 1<sup>st</sup> proboscis wriggling' shows that delayed proboscis wriggling was associated with a lack of host attraction and shed new light on this poorly characterized behavior. Altogether, we interpreted factor 2 as 'lack of host attraction'.

Factor 3: All the associated parameters measured durations before mosquitoes enter in contact with the mouse or initiate probing. As the factor loadings were negative, factor 3 indicated the speed with which the mosquitoes progressed towards the host. We interpreted factor 3 as 'attraction to host'.

Factor 4 and 5: Factor 4 was associated with all parameters related to proboscis grooming and interpreted as 'proboscis grooming', while factor 5 was associated with all parameters related to wing grooming and was interpreted as 'wing grooming'.

Factor 6: The factor was inversely related to 'duration at short-range' and 'duration at short-range before 1<sup>st</sup> probing', indicating an association with host attraction from short-range distance. The additional negative correlations with 'duration and average duration of immobilization at short-range distance' confirmed that the factor represented active engagement towards the mouse. We interpreted factor 6 as 'attraction to host from short-range distance'.

Factor 7: All the associated parameters measured duration and average durations of walking. During walking, mosquitoes search for cues. As the highest loading was for 'average duration of walking event in contact', we interpreted factor 7 as 'search for skin cues'.

#### *Biting behavior – data in S7-S8 Table and Fig. 3B*

Factor 1: 'Number of probes' and 'duration of probing' were negatively correlated with the factor, indicating that factor 1 was associated with less probing. 'Number of proboscis motions' and 'duration of proboscis motions' were also negatively correlated with the factor, as they occur during probing.



Importantly, factor 1 was negatively associated with three parameters measuring bite failure (i.e. 'number of unsuccessful bites', 'number of proboscis motions during unsuccessful bites' and 'duration of proboscis motions during unsuccessful bites'), indicating an association with successful bites, resulting in blood ingestion. Furthermore, 'number of probes' and 'total duration of probing before 1<sup>st</sup> blood ingestion' were inversely related with the factor, indicating an association with lower number of probes to reach blood. Finally, factor 1 was inversely correlated with 'duration of biting', which combines durations of probing and blood ingestion. As 'blood ingestion duration' (P58) was not clustered in factor 1 (S8 Table), this implies that probing duration was the main determinant of duration of biting. Altogether, we interpreted factor 1 as 'probing efficiency'.

Factor 2: Negative correlations with 'time from start to 1<sup>st</sup> blood ingestion', 'time from 1<sup>st</sup> time in contact to 1<sup>st</sup> blood ingestion' and 'duration in contact before 1<sup>st</sup> blood ingestion' indicated an association with swift mosquito progression towards blood ingestion. Furthermore, negative correlations with 'time from start to 1<sup>st</sup> successful bite' and 'time from 1<sup>st</sup> time in contact to 1<sup>st</sup> probing' indicated an association with eagerness to bite. Interestingly, factor 2 positively correlated with 'number of successful bites' and 'number of blood ingestion events'. These positive correlations suggest that swift progress towards blood ingestion was associated with higher frequency of blood ingestion. Altogether, factor 2 was interpreted as 'blood appetite'. Further supporting this interpretation, 'total abdomen swelling after blood-feeding' (P61) was moderately associated with the factor (S8 Table). Two other parameters apparently unrelated to blood appetite were also clustered. 'Duration in contact after blood ingestion' was positively associated and may indicate that larger blood meals immobilize mosquitoes after repletion. A positive correlation with 'length of inserted proboscis during blood ingestion' suggested that higher blood appetite forces the proboscis deeper into the skin.

Factor 3: Six of the correlated parameters measured number, duration and average duration of proboscis motions, clearly associating the factor with proboscis activity. Among these six parameters, two

were related to any probes and four to successful bites. 'Average duration of probe' was also positively correlated as it provides more time for proboscis motions. We interpreted factor 3 as 'proboscis activity during successful bites'.

Factor 4: The factor positively correlated with two parameters associated with proboscis motions during unsuccessful bites and 'average duration of probe before 1<sup>st</sup> blood ingestion'. We interpreted factor 4 as 'proboscis activity during unsuccessful bites'.

Factor 5: 'Duration of blood ingestion' and 'average duration of blood ingestion' were positively correlated with the factor, indicating an association with blood ingestion capacity. Supporting this interpretation, factor 5 was moderately correlated with the quantity of ingested blood as measured by 'total abdomen swelling after blood ingestion' (P61) and 'average abdomen swelling per blood ingestion' (P62) (S8 Table). We interpreted factor 5 as 'blood ingestion capacity'.

### **Univariate statistical analysis**

The differences in each behavioral parameter were analyzed with a one-sided Mann-Whitney test with a significance threshold set at 0.05. The differences in biting and blood ingestion rates were tested with  $\chi^2$ . Mann-Whitney and  $\chi^2$  analyses were done with SYSTAT 13.0 (Systat Software). The differences in viral loads between successive bites were analyzed with one-way repeated-measures ANOVA on log-transformed values with Prism (v 8.0.2, GraphPad).

### **Large cage host-seeking behavioral assay**

At 10 days post-infection, 10 mosquitoes starved for 24h were placed in a 30 x 30 x 30 cm mesh cage (BugDorm). Non-infected mosquitoes were used as controls. One anesthetized C57BL/6Ntac mouse was positioned on the top of the cage over a mesh that would allow the mosquitoes to bite the mouse. Mosquito behavior in the cage was video-recorded with a smartphone for 30 min. For each condition

(infected vs. control), three cages with different mosquitoes and different mice were done. The time from the start to the first contact with the mouse was recorded. The differences between infected and non-infected mosquitoes were analyzed using survival analysis (Prism v 8.0.2, GraphPad).

### **Calculation of biting and blood ingestion rates**

The biting rates were calculated by dividing the number of biting mosquitoes over the number of observed mosquitoes. Blood ingestion rates were calculated by dividing the number of blood-fed mosquitoes over the number of biting mosquitoes.

### **Successive bite assay**

Enclosed in the observation chamber, the same mosquito was allowed to bite three different shaved anesthetized C57BL/6Ntac mice in a row, with an interval of 10 min between mice. Mosquitoes were used 10 days post-oral infection. At 20 sec. after initiating a bite, the mosquito was disturbed to prevent blood-feeding. After 10 min of rest, the same mosquito was offered a different mouse and allowed to bite. In total, eight different mosquitoes were studied, each with three different mice. The experiment was conducted over two days with four mosquitoes studied each day.

Twenty-four hours after the biting, the mice were euthanized and approximately 1 cm<sup>2</sup> of belly skin and the inguinal lymph nodes were harvested. Total RNA was extracted using the RNeasy mini kit (Qiagen) according to the manufacturer's instructions. DENV load was quantified by quantitative real-time PCR using the SuperScript<sup>™</sup> III Platinum<sup>™</sup> One-step RT-qPCR system (Invitrogen) in a CFX96 Touch Real-Time PCR Detection System (Bio-Rad) with primer pair C14A 5'-AATATGCTGAAACGCGAGAGAAACCGCG -3' and C69B 5'-CCCATCTCITCAIATCCCTGCTGTTGG -3', and probe VICD2C38B 5'- AGCATTCCAAGTGAGAATCTCTTTGTCAGCTGT -3' (6). Absolute quantification was

done using a standard curve generated from a serial dilution of DNA plasmid containing the sequence of interest.

### Mathematical modelling of DENV epidemiology

A mathematical model relying on the simple SIR (Susceptible, Infectious, Recovered) compartmental model was used to determine the impact of blood feeding changes on DENV transmission potential, as inferred through the basic reproduction ratio  $R_0$ . SIR models are routinely applied to model dengue epidemiology (7–10). The model is detailed below as a system of ordinary differential equations:

$$\frac{dS_m}{dt} = \mu(S_m + I_m) - a_s b_m S_m \left( \frac{I}{S + I + R} \right) - \mu S_m$$

$$\frac{dI_m}{dt} = a_s b_m S_m \left( \frac{I}{S + I + R} \right) - \mu I_m$$

$$\frac{dS}{dt} = -a_i b_h I_m \left( \frac{S}{S + I + R} \right)$$

$$\frac{dI}{dt} = a_i b_h I_m \left( \frac{S}{S + I + R} \right) - \sigma I$$

$$\frac{dR}{dt} = \sigma I$$

The populations are compartmentalized according to their infectious status ( $S$ ,  $I$  and  $R$  for Susceptible, Infectious and Recovered human populations, respectively;  $S_m$  and  $I_m$  for Susceptible and Infectious mosquitoes, respectively – mosquitoes do not recover from infection). At the beginning of the simulation, all human individuals are susceptible and become infected according to the biting rate of infectious mosquitoes ( $a_i$ , which changed according to the behavioral scenario considered, see below), the number of infectious mosquitoes ( $I_m$ , which dynamically fluctuated) and the probability of infection when exposed to infectious mosquitoes ( $b_h$ , set at 0.5). When infected, humans recovered following the recovery rate  $\sigma$ , set at 5 days<sup>-1</sup>, and could not be infected again. Mosquito infection depends on the biting rate of susceptible mosquitoes ( $a_s$ , set at 4 days<sup>-1</sup>), the number of infectious humans ( $I$ , which dynamically

fluctuated) and probability of mosquito infection upon exposure to infected human ( $b_m$ , set at 0.5). While we did not consider human demography because we aimed to investigate the exponential growth of epidemics (e.g., the  $R_0$ ), we set mosquito demography,  $\mu$ , at 21 days<sup>-1</sup>. In this model, we considered that both human and mosquito population sizes were not affected by changes in blood feeding behavior. The values set for the various parameters are classical for arbovirus transmission models (11). We then ran simulations for 180 days starting with one human as infectious and all mosquitoes as susceptible. We quantified the  $R_0$  on the produced dynamics using two different  $R_0$  packages (<https://cran.r-project.org/web/packages/R0/index.html> and <https://cran.r-project.org/web/packages/EpiEstim/index.html>).

The variations in blood-feeding behavior between the infected and non-infected mosquitoes were included in the modelling parameter  $a_i$  by incorporating changes in P19 ('Duration at mid-range distance before 1<sup>st</sup> time in contact') and P39 ('Number of unsuccessful bites') means upon infection (Datasets S2 and S3). P19 and P39 were significantly affected by infection (see main text) and indicated changes in host-seeking and biting behaviors, respectively.  $R_0$  was calculated in different conditions: (i) Uninfected-mosquito behavior with a  $a_i$  equals to  $\alpha_s$ ; (ii) Host-seeking alterations: original  $a_i$  was changed proportionally to the impact of infection on P19 mean, i.e. multiplied by 1.51 (Dataset S2); (iii) Biting behavior alterations: original  $a_i$  was changed proportionally to the impact of infection on P39 mean, i.e. multiplied by 1.99 (Dataset S3); (iv) Host-seeking and biting alterations: original  $a_i$  was changed proportionally to the sum of the impact of infection on P19 and P39 means, i.e. multiplied by 3.5.

### Supplementary References

1. J. G. Low, *et al.*, Early Dengue infection and outcome study (EDEN) - study design and preliminary findings. *Ann Acad Med Singapore* **35**, 783–9 (2006).
2. J. Pompon, *et al.*, Dengue subgenomic flaviviral RNA disrupts immunity in mosquito salivary glands to increase virus transmission. *PLoS Pathogens* **13**, e1006535 (2017).

3. K. Connolly, The social facilitation of preening behaviour in *Drosophila melanogaster*. *Animal Behaviour* **16**, 385–391 (1968).
4. I. R. Cleasby, S. Nakagawa, H. Schielzeth, Quantifying the predictability of behaviour: statistical approaches for the study of between-individual variation in the within-individual variance. *Methods in Ecology and Evolution* **6**, 27–37 (2015).
5. M. D. Jennions, A. P. Møller, A survey of the statistical power of research in behavioral ecology and animal behavior. *Behav Ecol* **14**, 438–445 (2003).
6. W.-K. Wang, *et al.*, Detection of dengue virus replication in peripheral blood mononuclear cells from dengue virus type 2-infected patients by a reverse transcription-real-time PCR assay. *J Clin Microbiol* **40**, 4472–4478 (2002).
7. B. Adams, *et al.*, Cross-protective immunity can account for the alternating epidemic pattern of dengue virus serotypes circulating in Bangkok. *PNAS* **103**, 14234–14239 (2006).
8. Y. Nagao, K. Koelle, Decreases in dengue transmission may act to increase the incidence of dengue hemorrhagic fever. *PNAS* **105**, 2238–2243 (2008).
9. M. J. Keeling, P. Rohani, *Modeling Infectious Diseases in Humans and Animals* (Princeton University Press, 2011) (August 10, 2021).
10. D. A. T. Cummings, I. B. Schwartz, L. Billings, L. B. Shaw, D. S. Burke, Dynamic effects of antibody-dependent enhancement on the fitness of viruses. *PNAS* **102**, 15259–15264 (2005).
11. T. Sochacki, *et al.*, Imported chikungunya cases in an area newly colonised by *Aedes albopictus*: mathematical assessment of the best public health strategy. *Eurosurveillance* **21**, 30221 (2016).

## 2. Supplementary Movies

**S1 Movie.** One example of recorded video.

**S2 Movie.** Example of annotation of mosquito behavior.

## 3. Supplementary Figures

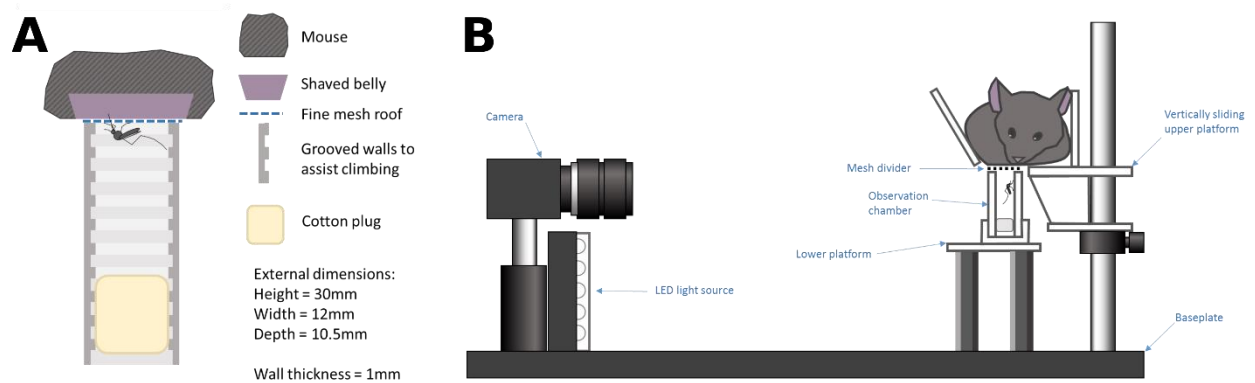

**S1 Fig.** Design of the behavior assay device

**A.** Dimensions of the observation chamber. **B.** Whole device including camera, LED light source, baseplate, lower platform, upper platform, observation chamber.

## 4. Supplementary Datasets

**Dataset S1.** Annotations of the mosquito behaviors.

**Dataset S2.** Values for the host-seeking behavioral parameters.

The 44 parameters associated with host-seeking were calculated for all control (CTRL) and DENV-infected (DENV) mosquitoes. Parameters are identified by their number as in Table 1. Mann-Whitney (MW) test p-values between both conditions are detailed. P-values lower than 0.05 are indicated in bold. Medians and arithmetic means for each parameter are detailed.

**Dataset S3.** Values for biting behavioral parameters.

The 36 parameters associated with biting were calculated only for control (CTRL) and DENV-infected (DENV) mosquitoes that probed. Parameters are identified by their number as in Table 1. Mann-Whitney (MW) test p-values between both conditions are detailed for all samples, for mosquitoes without zero (measured activity did not occur) and for mosquitoes that bloodfed. P-values lower than 0.05 are indicated in bold. Medians for all samples, for samples without zero, for mosquitoes that bloodfed only and arithmetic means for all samples are detailed.

**Dataset S4.** VBA code to calculate the behavior parameters from the behavioral annotations.



## 5. Supplementary Tables

### S1 Table. Definition of behavioral parameters

Parameters were categorized according to their position in the different feeding behavior sequences and stages (host-seeking or biting behavior). Biological interpretation of the parameters was attributed based on the understanding of the associated behavior.

| Nb. | Behavior phase | Biological interpretation | Behavioral parameter definition                                                           | Host-seeking or Biting behavior                                 |              |
|-----|----------------|---------------------------|-------------------------------------------------------------------------------------------|-----------------------------------------------------------------|--------------|
| 1   | Mid-range      | Sensing cues              | Total duration at mid-range distance                                                      | Host-seeking                                                    |              |
| 2   | Short-range    | Attraction to host        | Time from start to 1 <sup>st</sup> time at short-range distance                           | Host-seeking                                                    |              |
| 3   |                |                           | Time from 1 <sup>st</sup> time at short-range distance to 1 <sup>st</sup> probing         | Host-seeking                                                    |              |
| 4   |                |                           | Time from 1 <sup>st</sup> time at short-range distance to 1 <sup>st</sup> blood ingestion | Host-seeking                                                    |              |
| 5   |                |                           | Duration at mid-range distance before 1 <sup>st</sup> time at short-range distance        | Host-seeking                                                    |              |
| 6   |                |                           | Duration at short-range distance before 1 <sup>st</sup> probing                           | Host-seeking                                                    |              |
| 7   |                |                           | Sensing cues                                                                              | Total duration at short-range distance                          | Host-seeking |
| 8   |                |                           |                                                                                           | Number of immobile events at short-range distance               | Host-seeking |
| 9   |                |                           |                                                                                           | Duration immobile at short-range distance                       | Host-seeking |
| 10  |                |                           |                                                                                           | Average duration of immobile event at short-range distance      | Host-seeking |
| 11  |                |                           |                                                                                           | Number of walking events at short-range distance                | Host-seeking |
| 12  |                |                           |                                                                                           | Duration of walking at short-range distance                     | Host-seeking |
| 13  |                |                           |                                                                                           | Average duration of walking event at short-range distance       | Host-seeking |
| 14  |                |                           |                                                                                           | Duration at short-range distance after blood ingestion          | Biting       |
| 15  |                |                           |                                                                                           | Duration at short-range distance after unsuccessful bite        | Biting       |
| 16  | Contact        | Attraction to host        |                                                                                           | Time from start to 1 <sup>st</sup> time in contact              | Host-seeking |
| 17  |                |                           | Time from 1 <sup>st</sup> time in contact to 1 <sup>st</sup> probing                      | Biting                                                          |              |
| 18  |                |                           | Time from 1 <sup>st</sup> time in contact to 1 <sup>st</sup> blood ingestion              | Biting                                                          |              |
| 19  |                |                           | Duration at mid-range distance before 1 <sup>st</sup> time in contact                     | Host-seeking                                                    |              |
| 20  |                |                           | Duration at short-range distance before 1 <sup>st</sup> time in contact                   | Host-seeking                                                    |              |
| 21  |                |                           | Duration in contact before 1 <sup>st</sup> probing                                        | Host-seeking                                                    |              |
| 22  |                |                           | Duration in contact before 1 <sup>st</sup> blood ingestion                                | Biting                                                          |              |
| 23  |                |                           | Duration in contact after blood ingestion                                                 | Biting                                                          |              |
| 24  |                |                           | Sensing cues                                                                              | Duration at mid-range distance after in contact without probing | Host-seeking |
| 25  |                |                           |                                                                                           | Total duration in contact                                       | Host-seeking |
| 26  |                |                           |                                                                                           | Number of walking events in contact                             | Host-seeking |
| 27  |                |                           |                                                                                           | Duration of walking in contact                                  | Host-seeking |
| 28  |                |                           |                                                                                           | Average duration of walking event in contact                    | Host-seeking |

|    |                                                                    |                                                               |                                                                      |                                  |
|----|--------------------------------------------------------------------|---------------------------------------------------------------|----------------------------------------------------------------------|----------------------------------|
| 29 |                                                                    |                                                               | Number of proboscis wriggling before probing                         | Host-seeking                     |
| 30 |                                                                    |                                                               | Duration of proboscis wriggling before probing                       | Host-seeking                     |
| 31 |                                                                    |                                                               | Average duration of proboscis wriggling before probing               | Host-seeking                     |
| 32 | Probing                                                            | Attraction to host                                            | Time from start to 1 <sup>st</sup> probing                           | Host-seeking                     |
| 33 |                                                                    |                                                               | Time from 1 <sup>st</sup> probing to 1 <sup>st</sup> blood ingestion | Biting                           |
| 34 |                                                                    | Efficiency                                                    | Time from start to 1 <sup>st</sup> successful bite                   | Biting                           |
| 35 |                                                                    |                                                               | Number of probes                                                     | Biting                           |
| 36 |                                                                    |                                                               | Duration of probing                                                  | Biting                           |
| 37 |                                                                    |                                                               | Average duration per probe                                           | Biting                           |
| 38 |                                                                    |                                                               | Number of successful bites                                           | Biting                           |
| 39 |                                                                    |                                                               | Number of unsuccessful bites                                         | Biting                           |
| 40 |                                                                    |                                                               | Number of probes before 1 <sup>st</sup> blood ingestion              | Biting                           |
| 41 |                                                                    |                                                               | Total duration of probing before 1 <sup>st</sup> blood ingestion     | Biting                           |
| 42 | Average duration of probing before 1 <sup>st</sup> blood ingestion | Biting                                                        |                                                                      |                                  |
| 43 |                                                                    | Number of proboscis motions per probe                         | Biting                                                               |                                  |
| 44 |                                                                    | Total number of proboscis motions                             | Biting                                                               |                                  |
| 45 |                                                                    | Duration of proboscis in motion                               | Biting                                                               |                                  |
| 46 |                                                                    | Average duration of proboscis in motion per probe             | Biting                                                               |                                  |
| 47 |                                                                    | Average number of proboscis motions per successful bite       | Biting                                                               |                                  |
| 48 |                                                                    | Number of proboscis motions during successful bites           | Biting                                                               |                                  |
| 49 |                                                                    | Duration of proboscis in motion during successful bites       | Biting                                                               |                                  |
| 50 |                                                                    | Average duration of proboscis in motion per successful bite   | Biting                                                               |                                  |
| 51 |                                                                    | Average number of proboscis motions per unsuccessful bite     | Biting                                                               |                                  |
| 52 |                                                                    | Number of proboscis motions during unsuccessful bites         | Biting                                                               |                                  |
| 53 |                                                                    | Duration of proboscis in motion during unsuccessful bites     | Biting                                                               |                                  |
| 54 |                                                                    | Average duration of proboscis in motion per unsuccessful bite | Biting                                                               |                                  |
| 55 |                                                                    |                                                               | Length of inserted proboscis during blood ingestion                  | Biting                           |
| 56 | Blood ingestion                                                    | Attraction to host                                            | Time from start to 1 <sup>st</sup> blood ingestion                   | Biting                           |
| 57 |                                                                    |                                                               | Efficiency                                                           | Number of blood ingestion events |
| 58 |                                                                    | Duration of blood ingestion                                   |                                                                      | Biting                           |
| 59 |                                                                    | Average duration of blood ingestion event                     | Biting                                                               |                                  |
| 60 |                                                                    |                                                               | Duration of biting                                                   | Biting                           |
| 61 |                                                                    |                                                               | Total abdomen swelling after blood feeding                           | Biting                           |
| 62 |                                                                    |                                                               | Average abdomen swelling per blood ingestion event                   | Biting                           |
| 63 | Body maintenance                                                   | Proboscis                                                     | Time from start to 1 <sup>st</sup> proboscis grooming                | Host-seeking                     |
| 64 |                                                                    |                                                               | Number of proboscis grooming events                                  | Host-seeking                     |
| 65 |                                                                    |                                                               | Duration of proboscis grooming                                       | Host-seeking                     |
| 66 |                                                                    |                                                               | Average duration of proboscis grooming event                         | Host-seeking                     |
| 67 |                                                                    |                                                               | Time from start to 1 <sup>st</sup> proboscis wriggling               | Host-seeking                     |
| 68 |                                                                    |                                                               | Number of proboscis wriggling events                                 | Host-seeking                     |
| 69 |                                                                    |                                                               | Duration of proboscis wriggling                                      | Host-seeking                     |

|    |                    |            |                                                  |              |
|----|--------------------|------------|--------------------------------------------------|--------------|
| 70 |                    |            | Average duration of proboscis wriggling event    | Host-seeking |
| 71 |                    | Wings      | Time from start to 1 <sup>st</sup> wing grooming | Host-seeking |
| 72 |                    |            | Number of wing grooming events                   | Host-seeking |
| 73 |                    |            | Duration of wing grooming                        | Host-seeking |
| 74 |                    |            | Average duration of wing grooming event          | Host-seeking |
| 75 | Locomotor activity | Immobility | Number of immobile events                        | Host-seeking |
| 76 |                    |            | Duration immobile                                | Host-seeking |
| 77 |                    |            | Average duration of immobile event               | Host-seeking |
| 78 |                    | Walking    | Number of walking events                         | Host-seeking |
| 79 |                    |            | Duration of walking                              | Host-seeking |
| 80 |                    |            | Average duration of walking event                | Host-seeking |

---

**S2 Table.** Unit of each behavioral parameter and value if the behavior does not occur.

| <b>Nb.</b> | <b>Behavior parameters</b>                                                                | <b>Unit</b> | <b>Value given if the behavior does not occur</b>                                                                 |
|------------|-------------------------------------------------------------------------------------------|-------------|-------------------------------------------------------------------------------------------------------------------|
| 1          | Total duration at mid-range distance                                                      | Sec.        | If no mid-range = 0                                                                                               |
| 2          | Time from start to 1 <sup>st</sup> time at short-range distance                           | Sec.        | If no short-range = recording duration                                                                            |
| 3          | Time from 1 <sup>st</sup> time at short-range distance to 1 <sup>st</sup> probing         | Sec.        | If no probing = recording duration left after 1 <sup>st</sup> short-range                                         |
| 4          | Time from 1 <sup>st</sup> time at short-range distance to 1 <sup>st</sup> blood ingestion | Sec.        | If no blood ingestion = recording duration left after 1 <sup>st</sup> short-range                                 |
| 5          | Duration at mid-range distance before 1 <sup>st</sup> time at short-range distance        | Sec.        | If no short-range = recording duration                                                                            |
| 6          | Duration at short-range distance before 1 <sup>st</sup> probing                           | Sec.        | If no short-range = recording duration; If no probing = short-range duration                                      |
| 7          | Total duration at short-range distance                                                    | Sec.        | If no short-range = 0                                                                                             |
| 8          | Number of immobile events at short-range distance                                         | Count       | If no immobile event = 0                                                                                          |
| 9          | Duration immobile at short-range distance                                                 | Sec.        | If no immobile event = 0                                                                                          |
| 10         | Average duration of immobile event at short-range distance                                | Sec.        | If no immobile event = 0                                                                                          |
| 11         | Number of walking events at short-range distance                                          | Count       | If no walking event = 0                                                                                           |
| 12         | Duration of walking at short-range distance                                               | Sec.        | If no walking event = 0                                                                                           |
| 13         | Average duration of walking event at short-range distance                                 | Sec.        | If no walking event = 0                                                                                           |
| 14         | Duration at short-range distance after blood ingestion                                    | Sec.        | If no blood ingestion = 0                                                                                         |
| 15         | Duration at short-range distance after unsuccessful bite                                  | Sec.        | If no unsuccessful bite = 0                                                                                       |
| 16         | Time from start to 1 <sup>st</sup> time in contact                                        | Sec.        | If no contact = recording duration                                                                                |
| 17         | Time from 1 <sup>st</sup> time in contact to 1 <sup>st</sup> probing                      | Sec.        | If no probing = recording duration left after 1 <sup>st</sup> contact; If no contact = recording duration         |
| 18         | Time from 1 <sup>st</sup> time in contact to 1 <sup>st</sup> blood ingestion              | Sec.        | If no blood ingestion = recording duration left after 1 <sup>st</sup> contact; If no contact = recording duration |
| 19         | Duration at mid-range distance before 1 <sup>st</sup> time in contact                     | Sec.        | If no contact = total duration at mid-range                                                                       |
| 20         | Duration at short-range distance before 1 <sup>st</sup> time in contact                   | Sec.        | If no contact = total duration at short-range                                                                     |
| 21         | Duration in contact before 1 <sup>st</sup> probing                                        | Sec.        | If no probing = total duration in contact                                                                         |
| 22         | Duration in contact before 1 <sup>st</sup> blood ingestion                                | Sec.        | If no blood ingestion = total duration in contact                                                                 |
| 23         | Duration in contact after blood ingestion                                                 | Sec.        | If no blood ingestion = 0                                                                                         |
| 24         | Duration at mid-range distance after in contact without probing                           | Sec.        | If no contact = 0                                                                                                 |
| 25         | Total duration in contact                                                                 | Sec.        | If no contact = 0                                                                                                 |
| 26         | Number of walking events in contact                                                       | Count       | If no walking = 0                                                                                                 |
| 27         | Duration of walking in contact                                                            | Sec.        | If no walking = 0                                                                                                 |

|    |                                                                      |       |                                                                                                                   |
|----|----------------------------------------------------------------------|-------|-------------------------------------------------------------------------------------------------------------------|
| 28 | Average duration of walking event in contact                         | Sec.  | If no walking = 0                                                                                                 |
| 29 | Number of proboscis wriggling before probing                         | Count | If no proboscis wriggling = 0                                                                                     |
| 30 | Duration of proboscis wriggling before probing                       | Sec.  | If no proboscis wriggling = 0                                                                                     |
| 31 | Average duration of proboscis wriggling before probing               | Sec.  | If no proboscis wriggling = 0                                                                                     |
| 32 | Time from start to 1 <sup>st</sup> probing                           | Sec.  | If no probing = recording duration                                                                                |
| 33 | Time from 1 <sup>st</sup> probing to 1 <sup>st</sup> blood ingestion | Sec.  | If no blood ingestion = recording duration left after 1 <sup>st</sup> probing; If no probing = recording duration |
| 34 | Time from start to 1 <sup>st</sup> successful bite                   | Sec.  | If no successful bite = recording duration                                                                        |
| 35 | Number of probes                                                     | Count | If no probe = 0                                                                                                   |
| 36 | Duration of probing                                                  | Sec.  | If no probe = 0                                                                                                   |
| 37 | Average duration per probe                                           | Sec.  | If no probe = 0                                                                                                   |
| 38 | Number of successful bites                                           | Count | If no successful probe = 0                                                                                        |
| 39 | Number of unsuccessful bites                                         | Count | If no unsuccessful probe = 0                                                                                      |
| 40 | Number of probes before 1 <sup>st</sup> blood ingestion              | Count | If no blood ingestion = total number of probes                                                                    |
| 41 | Duration of probing before 1 <sup>st</sup> blood ingestion           | Sec.  | If no blood ingestion = total duration of probing                                                                 |
| 42 | Average duration of probing before 1 <sup>st</sup> blood ingestion   | Sec.  | If no blood ingestion = average duration of probe                                                                 |
| 43 | Number of proboscis motions per probe                                | Count | If no motion = 0                                                                                                  |
| 44 | Total number of proboscis motions                                    | Count | If no motion = 0                                                                                                  |
| 45 | Duration of proboscis in motion                                      | Sec.  | If no motion = 0                                                                                                  |
| 46 | Average duration of proboscis in motion per probe                    | Sec.  | If no motion = 0                                                                                                  |
| 47 | Average number of proboscis motions per successful bite              | Count | If no motion or successful bite = 0                                                                               |
| 48 | Number of proboscis motions during successful bites                  | Count | If no motion or successful bite = 0                                                                               |
| 49 | Duration of proboscis in motion during successful bites              | Sec.  | If no motion or successful bite = 0                                                                               |
| 50 | Average duration of proboscis in motion per successful bite          | Sec.  | If no motion or successful bite = 0                                                                               |
| 51 | Average number of proboscis motions per unsuccessful bite            | Count | If no motion or unsuccessful bite = 0                                                                             |
| 52 | Number of proboscis motions during unsuccessful bites                | Count | If no motion or unsuccessful bite = 0                                                                             |
| 53 | Duration of proboscis in motion during unsuccessful bites            | Sec.  | If no motion or unsuccessful bite = 0                                                                             |
| 54 | Average duration of proboscis in motion per unsuccessful bite        | Sec.  | If no motion or unsuccessful bite = 0                                                                             |
| 55 | Length of inserted proboscis during blood ingestion                  | mm    | If no blood ingestion = 0                                                                                         |
| 56 | Time from start to 1 <sup>st</sup> blood ingestion                   | Sec.  | If no blood ingestion = recording duration                                                                        |
| 57 | Number of blood ingestion events                                     | Count | If no blood ingestion = 0                                                                                         |
| 58 | Duration of blood ingestion                                          | Sec.  | If no blood ingestion = 0                                                                                         |
| 59 | Average duration of blood ingestion event                            | Sec.  | If no blood ingestion = 0                                                                                         |
| 60 | Duration of biting                                                   | Sec.  | If no probing and blood ingestion = 0                                                                             |

|    |                                                        |       |                                                |
|----|--------------------------------------------------------|-------|------------------------------------------------|
| 61 | Total abdomen swelling when blood feeding              | mm    | If no blood ingestion = 0                      |
| 62 | Average abdomen swelling per blood ingestion event     | mm    | If no blood ingestion = 0                      |
| 63 | Time from start to 1 <sup>st</sup> proboscis grooming  | Sec.  | If no proboscis grooming = 0                   |
| 64 | Number of proboscis grooming events                    | Count | If no proboscis grooming = 0                   |
| 65 | Duration of proboscis grooming                         | Sec.  | If no proboscis grooming = 0                   |
| 66 | Average duration of proboscis grooming event           | Sec.  | If no proboscis grooming = 0                   |
| 67 | Time from start to 1 <sup>st</sup> proboscis wriggling | Sec.  | If no proboscis wriggling = recording duration |
| 68 | Number of proboscis wriggling events                   | Count | If no proboscis wriggling = 0                  |
| 69 | Duration of proboscis wriggling                        | Sec.  | If no proboscis wriggling = 0                  |
| 70 | Average duration of proboscis wriggling event          | Sec.  | If no proboscis wriggling = 0                  |
| 71 | Time from start to 1 <sup>st</sup> wing grooming       | Sec.  | If no wing grooming = recording duration       |
| 72 | Number of wing grooming events                         | Count | If no wing grooming = 0                        |
| 73 | Duration of wing grooming                              | Sec.  | If no wing grooming = 0                        |
| 74 | Average duration of wing grooming event                | Sec.  | If no wing grooming = 0                        |
| 75 | Number of immobile events                              | Count | If no immobile event = 0                       |
| 76 | Duration immobile                                      | Sec.  | If no immobile event = 0                       |
| 77 | Average duration of immobile event                     | Sec.  | If no immobile event = 0                       |
| 78 | Number of walking events                               | Count | If no walking event = 0                        |
| 79 | Duration of walking                                    | Sec.  | If no walking event = 0                        |
| 80 | Average duration of walking event                      | Sec.  | If no walking event = 0                        |

---

**S3 Table.** Total variance explained by factors in the host-seeking behavior analysis and their statistical significance. P-values lower than 0.055 are identified in bold.

| Factor Nb.            | 1    | 2    | 3            | 4    | 5    | 6            | 7    | 8    | 9    | 10   | 11   |
|-----------------------|------|------|--------------|------|------|--------------|------|------|------|------|------|
| Variance explained, % | 14.8 | 10.6 | 8.9          | 8.0  | 7.9  | 7.6          | 7.5  | 7.4  | 6.6  | 3.8  | 3.3  |
| p-value <sup>1</sup>  | 0.44 | 0.35 | <b>0.047</b> | 0.29 | 0.16 | <b>0.054</b> | 0.27 | 0.11 | 0.29 | 0.18 | 0.27 |

#### S4 Table. Composition of host-seeking behavioral factors

Only parameters with loadings > 0.6 were shown. Parameter numbers are as in S1 Table.

|          | Parameter Nb. | Definition                                                                         | Loading |
|----------|---------------|------------------------------------------------------------------------------------|---------|
| Factor 1 | 11            | Number of walking events at short-range distance                                   | 0.886   |
|          | 78            | Number of walking events                                                           | 0.886   |
|          | 12            | Duration of walking at short-range distance                                        | 0.860   |
|          | 26            | Number of walking events in contact                                                | 0.825   |
|          | 75            | Number of immobile events                                                          | 0.786   |
|          | 8             | Number of immobile events at short-range distance                                  | 0.763   |
|          | 79            | Duration of walking                                                                | 0.743   |
| Factor 2 | 1             | Total duration at mid-range distance                                               | 0.858   |
|          | 76            | Duration immobile                                                                  | -0.829  |
|          | 25            | Total duration in contact                                                          | -0.749  |
|          | 77            | Average duration of immobile event                                                 | -0.68   |
|          | 24            | Duration at mid-range distance after in contact without probing                    | 0.668   |
|          | 67            | Time from start to 1 <sup>st</sup> proboscis wriggling                             | 0.608   |
| Factor 3 | 16            | Time from start to 1 <sup>st</sup> time in contact                                 | -0.827  |
|          | 2             | Time from start to 1 <sup>st</sup> time at short-range distance                    | -0.775  |
|          | 19            | Duration at mid-range distance before 1 <sup>st</sup> time in contact              | -0.754  |
|          | 21            | Duration at short-range distance before 1 <sup>st</sup> time in contact            | -0.731  |
|          | 20            | Duration in contact before 1 <sup>st</sup> probing                                 | -0.651  |
|          | 5             | Duration at mid-range distance before 1 <sup>st</sup> time at short-range distance | -0.619  |
| Factor 4 | 64            | Number of proboscis grooming events                                                | 0.965   |
|          | 65            | Duration of proboscis grooming                                                     | 0.962   |
|          | 66            | Average duration of proboscis grooming event                                       | 0.842   |
|          | 63            | Time from start to 1 <sup>st</sup> proboscis grooming                              | -0.838  |
| Factor 5 | 73            | Duration of wing grooming                                                          | 0.925   |
|          | 72            | Number of wing grooming events                                                     | 0.878   |
|          | 74            | Average duration of wing grooming event                                            | 0.838   |
|          | 71            | Time from start to 1 <sup>st</sup> wing grooming                                   | -0.811  |
| Factor 6 | 9             | Duration immobile at short-range distance                                          | -0.953  |
|          | 7             | Total duration at short-range distance                                             | -0.841  |
|          | 10            | Average duration of immobile event at short-range distance                         | -0.823  |
|          | 6             | Duration at short-range before 1 <sup>st</sup> probing                             | -0.605  |
| Factor 7 | 28            | Average duration of walking event in contact                                       | 0.973   |
|          | 80            | Average duration of walking event                                                  | 0.971   |
|          | 27            | Duration of walking in contact                                                     | 0.936   |
| Factor 8 | 29            | Number of proboscis wriggling before probing                                       | 0.984   |
|          | 30            | Duration of proboscis wriggling before probing                                     | 0.984   |
|          | 31            | Average duration of proboscis wriggling before probing                             | 0.984   |
| Factor 9 | 69            | Duration of proboscis wriggling                                                    | 0.804   |
|          | 70            | Average duration of proboscis wriggling event                                      | 0.804   |



**S5 Table.** Parameter loadings in each of the factors for the host-seeking behavior multivariate analysis.

Parameter numbers are as in S1 Table.

Highly defining parameters; loading > 0.6  
 Moderately defining parameters; 0.3 < loading < 0.6

| Parameter Nb. | Factor number |        |        |        |        |        |        |        |        |        |        |
|---------------|---------------|--------|--------|--------|--------|--------|--------|--------|--------|--------|--------|
|               | 1             | 2      | 3      | 4      | 5      | 6      | 7      | 8      | 9      | 10     | 11     |
| 1             | 0.063         | 0.858  | -0.253 | -0.109 | -0.076 | 0.148  | -0.087 | 0.059  | -0.232 | 0.211  | -0.054 |
| 76            | -0.164        | -0.829 | 0.076  | -0.208 | -0.018 | -0.237 | -0.138 | -0.058 | -0.027 | 0.268  | 0.016  |
| 25            | -0.282        | -0.749 | 0.202  | 0.121  | -0.097 | 0.384  | 0.088  | -0.047 | 0.255  | -0.196 | -0.039 |
| 77            | -0.321        | -0.68  | 0.044  | -0.143 | -0.055 | -0.098 | -0.08  | 0.011  | 0.091  | 0.347  | -0.281 |
| 24            | 0.204         | 0.668  | 0.475  | -0.107 | -0.062 | 0.07   | -0.04  | 0.098  | -0.252 | 0.256  | -0.133 |
| 67            | 0.353         | 0.608  | -0.231 | -0.112 | 0.199  | -0.175 | -0.065 | -0.068 | -0.378 | 0.261  | 0.174  |
| 32            | 0.464         | 0.534  | -0.311 | -0.12  | 0.173  | -0.214 | -0.07  | 0.046  | -0.388 | 0.193  | 0.194  |
| 11            | 0.886         | 0.219  | 0.111  | -0.033 | 0.103  | 0.018  | 0.025  | 0.256  | -0.055 | 0.034  | -0.154 |
| 78            | 0.886         | 0.196  | 0.126  | -0.02  | 0.113  | 0.042  | 0.039  | 0.263  | -0.047 | -0.019 | -0.183 |
| 12            | 0.86          | 0.255  | 0.13   | -0.039 | 0.084  | -0.038 | 0.065  | 0.145  | -0.079 | 0.096  | 0.074  |
| 26            | 0.825         | 0.123  | 0.156  | 0.016  | 0.133  | 0.103  | 0.073  | 0.263  | -0.02  | -0.161 | -0.25  |
| 75            | 0.786         | -0.031 | 0.129  | -0.065 | -0.008 | -0.193 | -0.07  | -0.186 | -0.191 | 0.002  | 0.239  |
| 8             | 0.763         | 0.067  | 0.082  | -0.034 | -0.019 | -0.29  | -0.054 | -0.183 | -0.185 | 0.06   | 0.222  |
| 79            | 0.743         | 0.178  | 0.13   | -0.037 | 0.088  | 0.01   | 0.579  | 0.107  | -0.065 | -0.012 | 0.034  |
| 9             | 0.097         | -0.055 | -0.036 | -0.064 | 0.086  | -0.953 | -0.038 | -0.062 | 0.009  | 0.019  | 0.096  |
| 7             | 0.378         | 0.054  | 0.013  | -0.051 | 0.266  | -0.841 | -0.026 | -0.004 | -0.102 | 0.035  | 0.139  |
| 10            | -0.192        | -0.053 | -0.045 | -0.033 | 0.023  | -0.823 | 0.021  | 0.01   | 0.27   | 0.075  | -0.241 |
| 6             | 0.434         | -0.073 | -0.096 | -0.076 | 0.281  | -0.605 | -0.025 | 0.003  | -0.438 | 0.106  | 0.191  |
| 64            | -0.048        | -0.004 | 0.03   | 0.965  | -0.019 | 0.035  | -0.018 | -0.002 | -0.006 | -0.005 | 0.021  |
| 65            | -0.038        | -0.02  | 0.032  | 0.962  | -0.02  | 0.031  | -0.01  | -0.002 | -0.013 | -0.026 | 0.026  |
| 66            | -0.02         | -0.026 | 0.031  | 0.842  | -0.028 | 0.038  | 0.001  | -0.01  | -0.003 | -0.11  | -0.011 |
| 63            | 0.045         | -0.014 | -0.029 | -0.838 | 0.024  | -0.043 | 0.026  | 0.008  | -0.015 | 0.046  | 0.027  |
| 28            | -0.056        | -0.048 | 0.025  | -0.017 | -0.038 | 0.005  | 0.973  | -0.016 | 0.001  | -0.003 | 0.081  |
| 80            | -0.062        | -0.021 | 0.017  | -0.016 | -0.028 | -0.006 | 0.971  | -0.018 | 0.021  | 0.02   | 0.182  |
| 27            | 0.247         | -0.002 | 0.069  | -0.018 | 0.052  | 0.064  | 0.936  | 0.009  | -0.017 | -0.139 | -0.032 |
| 29            | 0.123         | 0.036  | 0.017  | -0.008 | -0.029 | 0.017  | -0.003 | 0.984  | -0.017 | 0.003  | -0.009 |
| 30            | 0.123         | 0.036  | 0.017  | -0.008 | -0.029 | 0.017  | -0.003 | 0.984  | -0.017 | 0.003  | -0.009 |
| 31            | 0.123         | 0.036  | 0.017  | -0.008 | -0.029 | 0.017  | -0.003 | 0.984  | -0.017 | 0.003  | -0.009 |
| 73            | -0.009        | 0.031  | -0.067 | -0.019 | 0.925  | -0.121 | -0.001 | 0.014  | -0.087 | -0.005 | 0.076  |
| 72            | -0.016        | -0.002 | -0.068 | -0.025 | 0.878  | -0.126 | -0.042 | 0.008  | -0.125 | -0.013 | 0.159  |
| 74            | 0.159         | 0.116  | 0.045  | -0.021 | 0.838  | 0.006  | 0.065  | -0.042 | 0.014  | 0.054  | -0.173 |
| 71            | -0.232        | 0.018  | -0.069 | 0.031  | -0.811 | 0.099  | 0.019  | 0.064  | 0.084  | -0.037 | 0.039  |
| 16            | -0.169        | 0.291  | -0.827 | -0.037 | 0.043  | -0.141 | -0.051 | -0.016 | -0.138 | -0.04  | 0.145  |
| 2             | -0.122        | 0.241  | -0.775 | -0.008 | -0.083 | 0.078  | -0.034 | -0.025 | 0.019  | -0.042 | -0.135 |
| 19            | -0.141        | -0.132 | -0.754 | -0.034 | -0.091 | 0.048  | -0.052 | -0.027 | 0.123  | 0.399  | -0.177 |
| 21            | 0             | 0.242  | -0.731 | -0.067 | 0.182  | 0.068  | -0.043 | 0.001  | -0.177 | -0.011 | 0.184  |
| 20            | -0.126        | -0.089 | -0.651 | -0.048 | 0.043  | -0.311 | -0.008 | 0.011  | -0.343 | -0.042 | -0.067 |
| 5             | -0.117        | -0.303 | -0.619 | -0.022 | -0.123 | 0.008  | -0.024 | -0.02  | 0.165  | 0.416  | -0.325 |
| 69            | -0.19         | -0.252 | 0.101  | -0.02  | -0.117 | -0.041 | 0.001  | -0.027 | 0.804  | -0.228 | 0.126  |
| 70            | -0.147        | -0.286 | 0.046  | -0.081 | -0.094 | -0.167 | -0.053 | -0.017 | 0.804  | 0.138  | 0.089  |
| 4             | 0.445         | 0.47   | -0.1   | -0.071 | 0.172  | -0.148 | -0.058 | 0.036  | -0.505 | -0.034 | 0.08   |
| 68            | -0.093        | -0.15  | 0.112  | 0.196  | -0.106 | 0.134  | 0.085  | -0.011 | 0.142  | -0.801 | -0.152 |
| 13            | -0.016        | 0.1    | 0.097  | 0.011  | 0.013  | -0.039 | 0.309  | -0.023 | 0.141  | 0.099  | 0.722  |
| 3             | 0.499         | 0.416  | -0.2   | -0.129 | 0.182  | -0.231 | -0.064 | 0.056  | -0.478 | 0.218  | 0.162  |

**S6 Table.** Total variance explained by factors in the biting behavior analysis and their statistical significance. P-values lower than 0.055 are identified in bold.

| Factor Nb.            | 1            | 2    | 3    | 4    | 5    | 6    | 7    | 8    |
|-----------------------|--------------|------|------|------|------|------|------|------|
| Variance explained, % | 25.3         | 19.2 | 16.4 | 10.8 | 6.5  | 4.6  | 4.8  | 3.5  |
| p-value <sup>1</sup>  | <b>0.052</b> | 0.31 | 0.39 | 0.22 | 0.40 | 0.34 | 0.31 | 0.25 |

<sup>1</sup>p-value as determined by T-test.

**S7 Table. Composition of biting behavioral factors**

Only parameters with loadings > 0.6 were shown. Parameter numbers are as in S1 Table.

|          | Parameter Nb. | Definition                                                                   | Loading                                                       |
|----------|---------------|------------------------------------------------------------------------------|---------------------------------------------------------------|
| Factor 1 | 35            | Number of probes                                                             | -0.931                                                        |
|          | 39            | Number of unsuccessful bites                                                 | -0.917                                                        |
|          | 52            | Number of proboscis motions during unsuccessful bites                        | -0.916                                                        |
|          | 53            | Duration of proboscis in motion during unsuccessful bites                    | -0.915                                                        |
|          | 36            | Duration of probing                                                          | -0.91                                                         |
|          | 45            | Duration of proboscis in motion                                              | -0.901                                                        |
|          | 44            | Total number of proboscis motions                                            | -0.899                                                        |
|          | 60            | Duration of biting                                                           | -0.848                                                        |
|          | 40            | Number of probes before 1 <sup>st</sup> blood ingestion                      | -0.775                                                        |
|          | 41            | Total duration of probing before 1 <sup>st</sup> blood ingestion             | -0.764                                                        |
| Factor 2 | 56            | Time from start to 1 <sup>st</sup> blood ingestion                           | -0.903                                                        |
|          | 34            | Time from start to 1 <sup>st</sup> successful bite                           | -0.9                                                          |
|          | 23            | Duration in contact after blood ingestion                                    | 0.861                                                         |
|          | 18            | Time from 1 <sup>st</sup> time in contact to 1 <sup>st</sup> blood ingestion | -0.837                                                        |
|          | 17            | Time from 1 <sup>st</sup> time in contact to 1 <sup>st</sup> probing         | -0.729                                                        |
|          | 55            | Length of inserted proboscis during blood ingestion                          | 0.715                                                         |
|          | 38            | Number of successful bites                                                   | 0.658                                                         |
|          | 22            | Duration in contact before 1 <sup>st</sup> blood ingestion                   | -0.627                                                        |
|          | 57            | Number of blood ingestion events                                             | 0.615                                                         |
|          | Factor 3      | 50                                                                           | Average duration of proboscis in motion per successful bite   |
| 47       |               | Average number of proboscis motions per successful bite                      | 0.859                                                         |
| 49       |               | Duration of proboscis in motion during successful bites                      | 0.836                                                         |
| 46       |               | Average duration of proboscis in motion per probe                            | 0.814                                                         |
| 37       |               | Average duration per probe                                                   | 0.811                                                         |
| 48       |               | Number of proboscis motions during successful bites                          | 0.802                                                         |
| 43       |               | Number of proboscis motions per probe                                        | 0.717                                                         |
| Factor 4 |               | 54                                                                           | Average duration of proboscis in motion per unsuccessful bite |
|          | 51            | Average number of proboscis motions per unsuccessful bite                    | 0.924                                                         |
|          | 42            | Average duration of probing before 1 <sup>st</sup> blood ingestion           | 0.910                                                         |
| Factor 5 | 58            | Duration of blood ingestion                                                  | 0.903                                                         |
|          | 59            | Average duration of blood ingestion event                                    | 0.897                                                         |

**S8 Table.** Parameter loadings in each of the factors of the biting behavior multivariate analysis. Parameter numbers are as in S1 Table.

Highly defining parameters; loading > 0.6

Moderately defining parameters; 0.3 < loading < 0.6

| Parameter Nb. | Factor number |        |        |        |        |        |        |        |
|---------------|---------------|--------|--------|--------|--------|--------|--------|--------|
|               | 1             | 2      | 3      | 4      | 5      | 6      | 7      | 8      |
| 35            | -0.931        | -0.06  | -0.16  | -0.141 | -0.082 | 0.021  | -0.03  | 0.006  |
| 39            | -0.917        | -0.142 | -0.191 | -0.125 | -0.109 | 0.007  | 0.039  | 0.024  |
| 52            | -0.916        | -0.139 | -0.05  | 0.277  | -0.101 | 0.02   | 0.009  | 0.005  |
| 53            | -0.915        | -0.194 | -0.046 | 0.231  | -0.12  | -0.098 | 0.03   | 0.02   |
| 36            | -0.91         | -0.085 | 0.282  | 0.17   | -0.094 | -0.083 | -0.126 | 0.013  |
| 45            | -0.901        | -0.093 | 0.294  | 0.17   | -0.098 | -0.085 | -0.129 | 0.01   |
| 44            | -0.899        | -0.046 | 0.258  | 0.203  | -0.072 | 0.047  | -0.144 | -0.023 |
| 60            | -0.848        | 0.019  | 0.319  | 0.151  | 0.277  | -0.082 | -0.222 | 0.017  |
| 40            | -0.775        | -0.311 | -0.202 | -0.182 | -0.057 | -0.126 | 0.193  | 0.086  |
| 41            | -0.764        | -0.365 | 0.063  | 0.292  | -0.026 | -0.231 | 0.201  | 0.077  |
| 22            | -0.582        | -0.627 | -0.038 | 0.278  | -0.074 | -0.133 | 0.082  | 0.105  |
| 33            | -0.571        | -0.473 | -0.06  | 0.188  | -0.078 | -0.608 | 0.111  | 0.065  |
| 56            | -0.195        | -0.903 | 0.025  | 0.098  | -0.071 | -0.105 | 0.071  | 0.131  |
| 34            | -0.199        | -0.9   | -0.029 | 0.104  | -0.096 | -0.108 | 0.051  | 0.128  |
| 23            | 0.145         | 0.861  | 0.002  | -0.032 | 0.054  | 0.095  | -0.07  | 0.4    |
| 18            | -0.325        | -0.837 | -0.089 | 0.261  | -0.078 | -0.176 | 0.016  | 0.071  |
| 17            | 0.219         | -0.729 | -0.065 | 0.175  | -0.023 | 0.505  | -0.118 | 0.03   |
| 55            | 0.196         | 0.715  | 0.337  | -0.056 | 0.203  | 0.16   | 0.03   | -0.003 |
| 38            | 0.027         | 0.658  | 0.275  | -0.108 | 0.227  | 0.107  | -0.547 | -0.145 |
| 57            | 0.021         | 0.615  | 0.274  | -0.14  | 0.178  | 0.079  | -0.612 | 0.002  |
| 61            | 0.32          | 0.591  | 0.015  | -0.04  | 0.465  | 0.142  | 0.172  | -0.14  |
| 50            | -0.025        | 0.234  | 0.911  | -0.086 | 0.09   | 0.046  | -0.018 | -0.004 |
| 47            | -0.06         | 0.197  | 0.859  | -0.151 | 0.106  | 0.123  | -0.052 | -0.094 |
| 49            | -0.095        | 0.223  | 0.836  | -0.118 | 0.037  | 0.018  | -0.391 | -0.023 |
| 46            | 0.004         | -0.152 | 0.814  | 0.399  | -0.025 | -0.077 | 0.136  | 0.138  |
| 37            | 0.021         | -0.123 | 0.811  | 0.4    | -0.021 | -0.076 | 0.155  | 0.145  |
| 48            | -0.138        | 0.217  | 0.802  | -0.139 | 0.055  | 0.074  | -0.402 | -0.074 |
| 43            | -0.019        | -0.131 | 0.717  | 0.528  | 0.084  | 0.101  | 0.136  | 0.045  |
| 54            | -0.227        | -0.19  | 0.009  | 0.924  | -0.077 | -0.04  | 0.028  | 0.062  |
| 51            | -0.162        | -0.101 | 0.031  | 0.924  | 0.02   | 0.076  | 0.037  | 0.023  |
| 42            | -0.168        | -0.173 | 0.086  | 0.91   | 0.009  | -0.057 | 0.01   | 0.05   |
| 58            | 0.055         | 0.246  | 0.122  | -0.029 | 0.903  | -0.008 | -0.25  | 0.01   |
| 59            | 0.17          | 0.138  | 0.077  | 0.006  | 0.897  | 0.06   | 0.126  | -0.01  |
| 15            | -0.08         | -0.358 | -0.139 | -0.027 | -0.078 | -0.824 | -0.046 | 0.008  |
| 62            | 0.372         | 0.4    | 0.038  | 0.035  | 0.406  | 0.179  | 0.564  | -0.144 |
| 14            | 0.097         | 0.111  | -0.05  | -0.121 | 0.033  | 0.022  | -0.003 | -0.955 |

**S9 Table.** Duration before proboscis insertion for the transmission assay.

| Mosquito number | Successive bite number | Duration before proboscis insertion <sup>1</sup> |
|-----------------|------------------------|--------------------------------------------------|
| 1               | 1                      | < 1 min                                          |
|                 | 2                      | < 1 min                                          |
|                 | 3                      | < 1 min                                          |
| 2               | 1                      | < 1 min                                          |
|                 | 2                      | < 1 min                                          |
|                 | 3                      | < 2 min                                          |
| 3               | 1                      | < 1 min                                          |
|                 | 2                      | < 1.5 min                                        |
|                 | 3                      | < 1 min                                          |
| 4               | 1                      | < 1 min                                          |
|                 | 2                      | < 2 min                                          |
|                 | 3                      | < 3 min                                          |
| 5               | 1                      | < 1 min                                          |
|                 | 2                      | < 3 min                                          |
|                 | 3                      | < 1 min                                          |
| 6               | 1                      | < 1 min                                          |
|                 | 2                      | < 3 min                                          |
|                 | 3                      | < 1 min                                          |
| 7               | 1                      | < 1 min                                          |
|                 | 2                      | < 2 min                                          |
|                 | 3                      | < 2 min                                          |
| 8               | 1                      | < 1 min                                          |
|                 | 2                      | < 2 min                                          |
|                 | 3                      | < 1 min                                          |

<sup>1</sup> Proboscis insertion was monitored visually.
